# Supplementary material
Source: publisher site journal article supplement (https://www.degruyterbrill.com/publication/journal_key/HTMP/downloadAsset/HTMP_CFP%20Advancements%20in%20high%20temperature%20polymer%20matrix%20composites.pdf)
Supplement: Supplementary file 1 [file HTMP_CFP%20Advancements%20in%20high%20temperature%20polymer%20matrix%20composites.pdf]

Special Issue in High Temperature Materials and Processes:

## ADVANCEMENTS IN HIGH TEMPERATURE POLYMER MATRIX COMPOSITES

### GUEST EDITORS

---

**Dr. VINAYAGAM MOHANAVEL** Bharath Institute of Higher Education and Research;  
mohanavel.mech@bharathuniv.ac.in

**Dr. PALANIVEL VELMURUGAN** Bharath Institute of Higher Education and Research;  
palanivelvelmurugan@bharathuniv.ac.in

**Dr. SUBPIRAMANIYAM SIVAKUMAR** Pusan National University, South Korea;  
ssivaphd@pusan.ac.kr

### SCOPE OF THE ISSUE

---

This Special Collections objective is to provide a forum for scientists, engineers, researchers, and practitioners to present and share their most recent discoveries, advancements, and perspectives in the field of high temperature polymer composites. In particular, this collection focusses on advancing our knowledge and comprehension of high temperature polymer composites and promoting their real-world applications to tackle urgent global issues in resource conservation, environmental sustainability, and enhanced product performance.

### SHORT DESCRIPTION OF CONTENT

---

Additionally, this Special Collection seeks to bring professionals and researchers together by giving them a platform to showcase and discuss state-of-the-art research on sustainable polymer composite materials. In addition to expanding knowledge, the emphasis is on encouraging useful engineering applications that support the larger global sustainability goal. In addition to addressing the pressing environmental and resource conservation issues of our day, this collection provides an essential forum for the sharing of ideas and collaboration among experts in the area.

## HOW TO SUBMIT

---

Before submission authors should carefully read the Instruction for Authors. In order to make the preparation of manuscript easier, you are advised to use the Manuscript Template.

All submissions to the Special Issue must be made electronically via the Editorial Manager submission and tracking review system.

All manuscripts will undergo the standard peer-review process (single-blind, at least two independent reviewers). When entering your submission via online submission system please choose “SpecialIssue\_Advancements in high temperature polymer matrix composites”.

The deadline for submissions is 31th May, 2025, but individual papers will be reviewed and published online on an ongoing basis.

In case of any question please contact Ms. Joanna Kosińska, Managing Editor of High Temperature Materials and Processes, [Joanna.Kosinska@degruyter.com](mailto:Joanna.Kosinska@degruyter.com)
